# Supplementary material for: Father’s adolescent body silhouette is associated with offspring asthma, lung function and BMI through DNA methylation
Source: Springer Nature journal article supplement (doi:10.1038/s42003-025-08121-9), 2025-05-24
Supplement: MOESM1 [file 42003_2025_8121_MOESM1_ESM.pdf]

Father's adolescent body silhouette is associated with offspring asthma, lung function and BMI through DNA methylation

Negusse Tadesse Kitaba<sup>1</sup>, Toril Mørkve Østergaard<sup>2</sup>, Marianne Lønnebotn<sup>3</sup>, Simone Accordini<sup>4</sup>, Francisco Gómez Real<sup>5</sup>, Andrei Malinowski<sup>6</sup>, Anna Oudin<sup>7</sup>, Bryndis Benediktsdottir<sup>8</sup>, Francisco Javier Callejas González<sup>9</sup>, Leopoldo Palacios Gómez<sup>10</sup>, Mathias Holm<sup>11</sup>, Nils Oskar Jøgi<sup>6</sup>, Shyamali C. Dharmage<sup>12</sup>, Svein Magne Skulstad<sup>2</sup>, Vivi Schlünssen<sup>13</sup>, Cecilie Svanes<sup>2, 14\*#</sup>, John W. Holloway<sup>1,15#</sup>

**Supplementary data** (<https://doi.org/10.5258/SOTON/D3067>)

Note EWAS list and label used on each excel sheet.

1. Summary statistics for association father body silhouette and offspring DNA methylation at FDR  $\leq 0.05$ .
  - a. Data 1A EWAS dmCpGs.xlsx
  - b. Data 1B EWAS dmCpGs Mvalue and beta compared\_VB.xlsx and
2. Differential methylated region Data 2 DMR.xlsx
3. Look up of dmCpGs overlap with transcription factor binding sites from eForege-TF q-value  $< 0.05$ . Data 3 TF.xlsx
4. Look-up of dmCpGs in EWAS Atlas effect methylation on gene expression(meQTL)  $p < 0.05$ . Data 4 eQTL.xlsx
5. Pathway signalling enrichment from methylR. Data 5 methylRR.xlsx
6. Gene ontology terms, gene description and lipid traits from String database for dmCpGs at FDR  $\leq 0.05$ . Data 6 Gene ontology terms.xlsx
7. Pathway signalling enrichment from KEGG and Wikipathway. Data 7 KEGG Wikipathway.xls
8. Lookup overlap GWAS catalogue FUMAGWAS and enrichr dbGAP. Data 8 Overlab GWAS Catalogue.xlsx
9. Look-up of dmCpGs in EWAS Atlas for overlap of known traits  $p < 0.05$  Data 9 Overlap EWASatlas.xlsx
10. Lookup SNP methylation interaction for meQTL from goDMC and meQTL EPIC database at  $p > 0.05$ . Data 10A meQTL goDMC.xlsx and Data 10B meQTL EPIC Database.xlsx
11. Lookup imprintome: Data 11 imprinted gene and metastable epialleles.xlsx
12. Association Offspring health outcome.
  - a. Data 12A BMI.xlsx
  - b. Data 12B Asthma.xlsx
  - c. Data 12C Lung function.xlsx
13. Association Offspring BMI and body silhouette: Data 13 offspring BMI and body silhouette.xlsx
14. Lookup of overlap of obesity related gene : Data 14 Obesity related dmCpG Open Targets and DisGeNET.xlsx

## Supplementary Figures

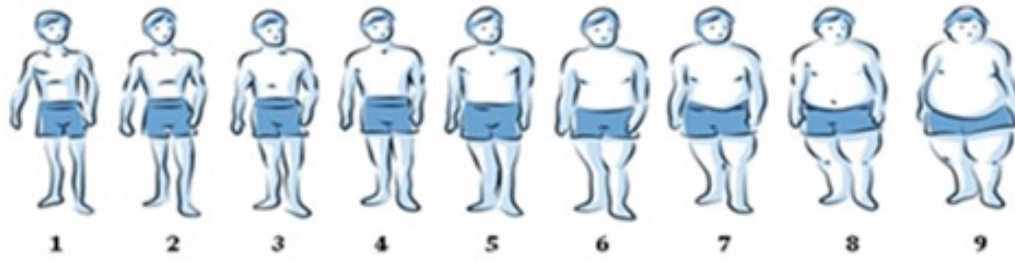

Supplemental Fig. 1 Body silhouettes in scale 1: 9.

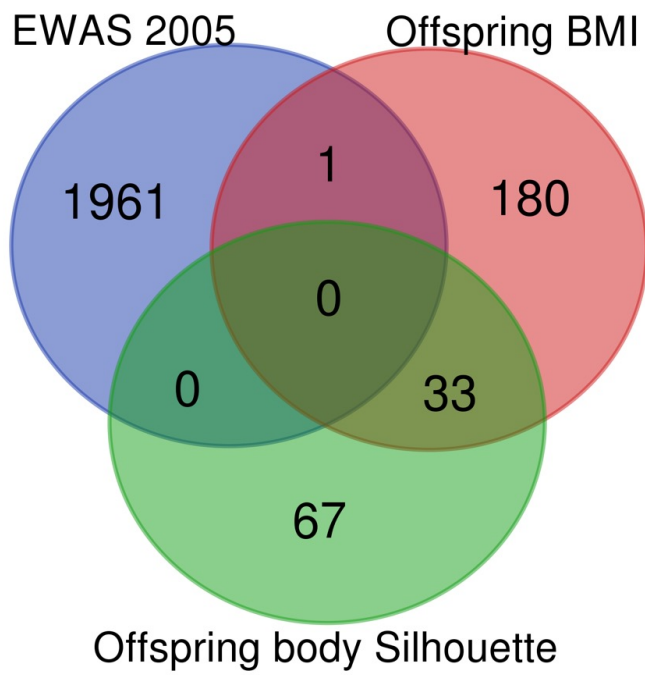

Supplemental Fig. 2 Shared dmCpGs between EWAS of offspring current BMI (red), EWAS of offspring current body silhouette (green) and 1962 unique dmCpGs associated with father body silhouette.

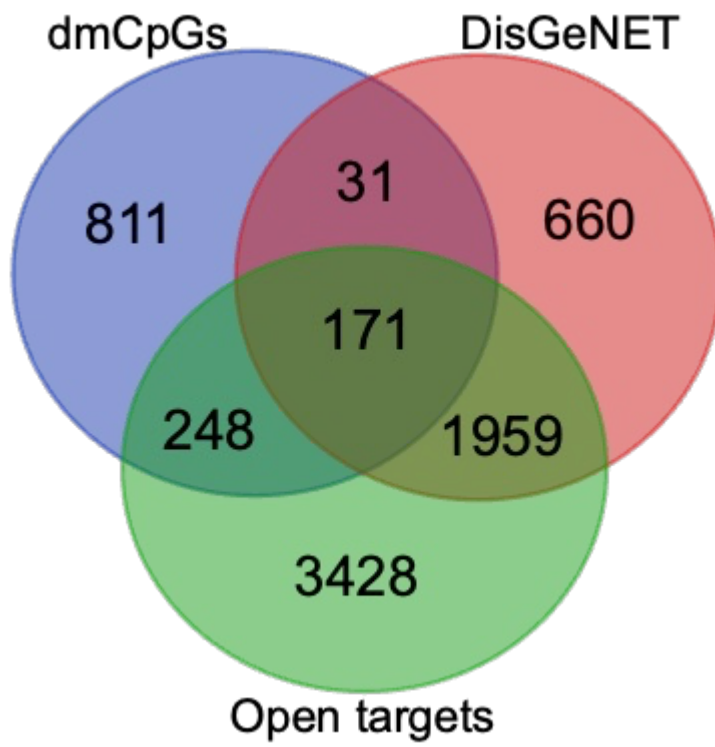

Supplemental Fig. 3: Shared obesity-related genes between RHINESSA EWAS genes (dmCpGs), Open target and DisGeNET database.
